# Supplementary material for: Rational Engineering and Preclinical Evaluation of Neddylation and SUMOylation Site Modified Adeno-Associated Virus Vectors in Murine Models of Hemophilia B and Leber Congenital Amaurosis
Source: PubMed Central journal article supplement (PMC6919284; doi:10.1089/hum.2019.164), 2019-11-26
Supplement: Supp_Fig1.pdf [file Supp_Fig1.pdf]

## Supplementary Data

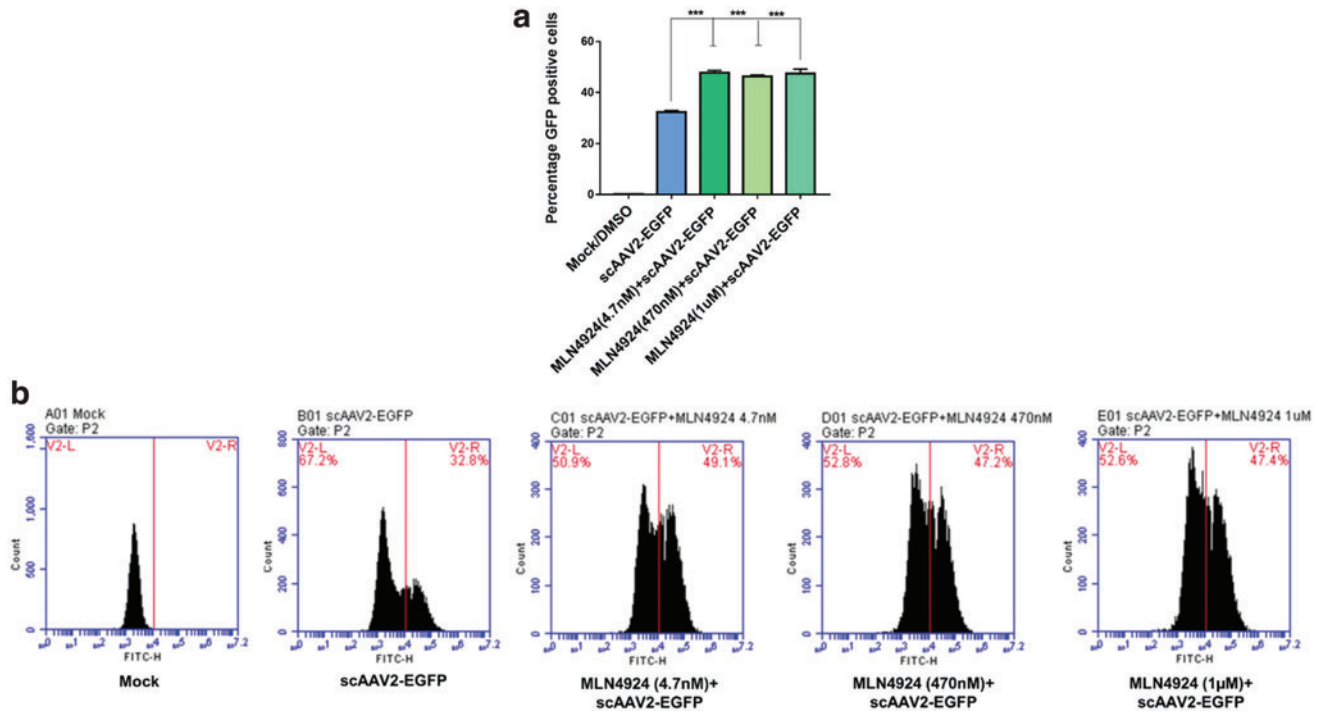

**Supplementary Figure S1.** Transduction efficiency of AAV2 vectors in cells pretreated with a small-molecule inhibitor of Neddylolation. Approximately  $3 \times 10^4$  HeLa cells were either mock-treated (DMSO) or treated with a Neddylolation inhibitor, MLN4924, at a concentration of 4.7 nM, 470 nM, and 1  $\mu$ M and incubated at 37°C for 3 h. After incubation, cells were infected with scAAV2-EGFP vectors at an MOI of  $5 \times 10^3$  vgs/cell for 3 h. Forty-eight hours later, the transgene (GFP) expression (**a**) was quantified by flow cytometry (BD Accuri C6 Plus; BD Biosciences, Franklin Lakes, NJ). Data presented are a representative histogram (**b**) from a panel of five replicates for analysis carried out in (**a**). Dunnett's multiple comparisons test was performed to determine the statistical significance. Data are expressed as mean  $\pm$  SD,  $n=5$ , \*\*\* $p \leq 0.001$ . The experiments were repeated twice (biological replicate=2) to confirm the findings. DMSO, dimethyl sulfoxide; GFP, green fluorescent protein; MOI, multiplicity of infection; SD, standard deviation.
