# Supplementary material for: Rational Engineering and Preclinical Evaluation of Neddylation and SUMOylation Site Modified Adeno-Associated Virus Vectors in Murine Models of Hemophilia B and Leber Congenital Amaurosis
Source: PubMed Central journal article supplement (PMC6919284; doi:10.1089/hum.2019.164), 2019-11-26
Supplement: Supp_Fig4.pdf [file Supp_Fig4.pdf]

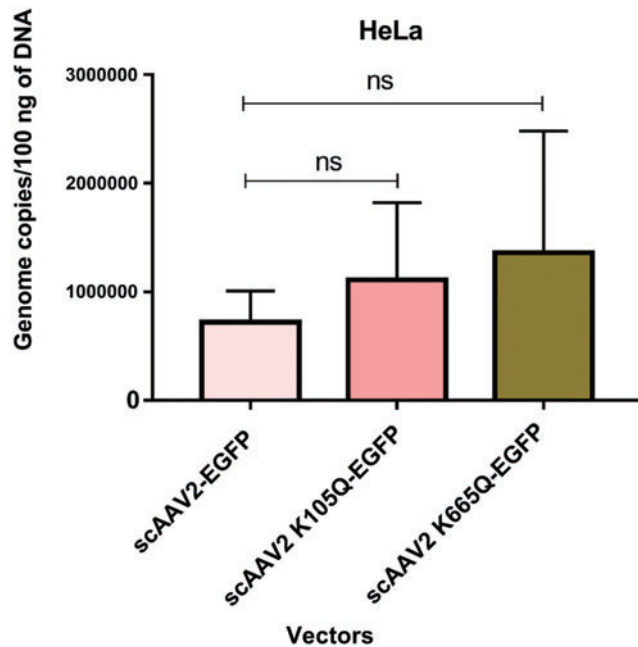

**Supplementary Figure S4.** Viral entry assay. HeLa cells were mock-infected or infected with scAAV2-EGFP, scAAV2 K105Q-EGFP, and scAAV2 K665Q-scEGFP mutant vector at an MOI of  $1 \times 10^4$  vgs/cell. Genomic DNA was isolated after 3 h and the vector copy number was estimated by qPCR. The data represent vector copies per diploid genome and are expressed as mean  $\pm$  SD from three independent experiments with three replicates for each condition. Dunnett's multiple comparisons test was used to determine the statistical significance. Data were normalized to mock condition. ns, not significant.

---
