# Supplementary material for: Rational Engineering and Preclinical Evaluation of Neddylation and SUMOylation Site Modified Adeno-Associated Virus Vectors in Murine Models of Hemophilia B and Leber Congenital Amaurosis
Source: PubMed Central journal article supplement (PMC6919284; doi:10.1089/hum.2019.164), 2019-11-26
Supplement: Supp_Fig5.pdf [file Supp_Fig5.pdf]

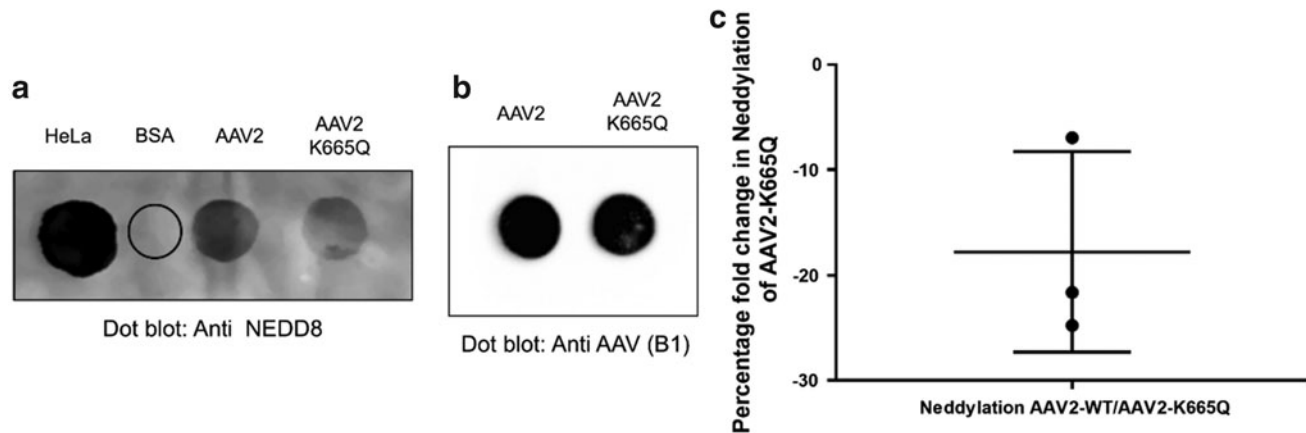

**Supplementary Figure S5.** Dot blot analysis for AAV2 vectors. About  $1.42 \times 10^{10}$  vector genomes of AAV2 and AAV2 K665Q vectors were spotted on PVDF membrane in equal volumes. The level of NEDD8 protein on vector capsids was probed by dot blot assay (**a**) and further quantified (**c**) as described in the Materials and Methods section. Anti-AAV capsid B1 antibody was used as a loading control (**b**). The field of view pertaining to loaded samples from the entire blot is shown in the image. Exposure time for NEDD8 and B1 antibody immune-reactive blots was 9 min 47 s and 36 s, respectively, and the mean of densitometric changes between AAV2 wild-type and AAV2 K665Q vectors at these exposures is presented in (**c**). HeLa cell lysate was used as a positive control for the assay. Data are representative from two independent biological replicates.
