# Supplementary material for: Rational Engineering and Preclinical Evaluation of Neddylation and SUMOylation Site Modified Adeno-Associated Virus Vectors in Murine Models of Hemophilia B and Leber Congenital Amaurosis
Source: PubMed Central journal article supplement (PMC6919284; doi:10.1089/hum.2019.164), 2019-11-26
Supplement: Supp_Fig6.pdf [file Supp_Fig6.pdf]

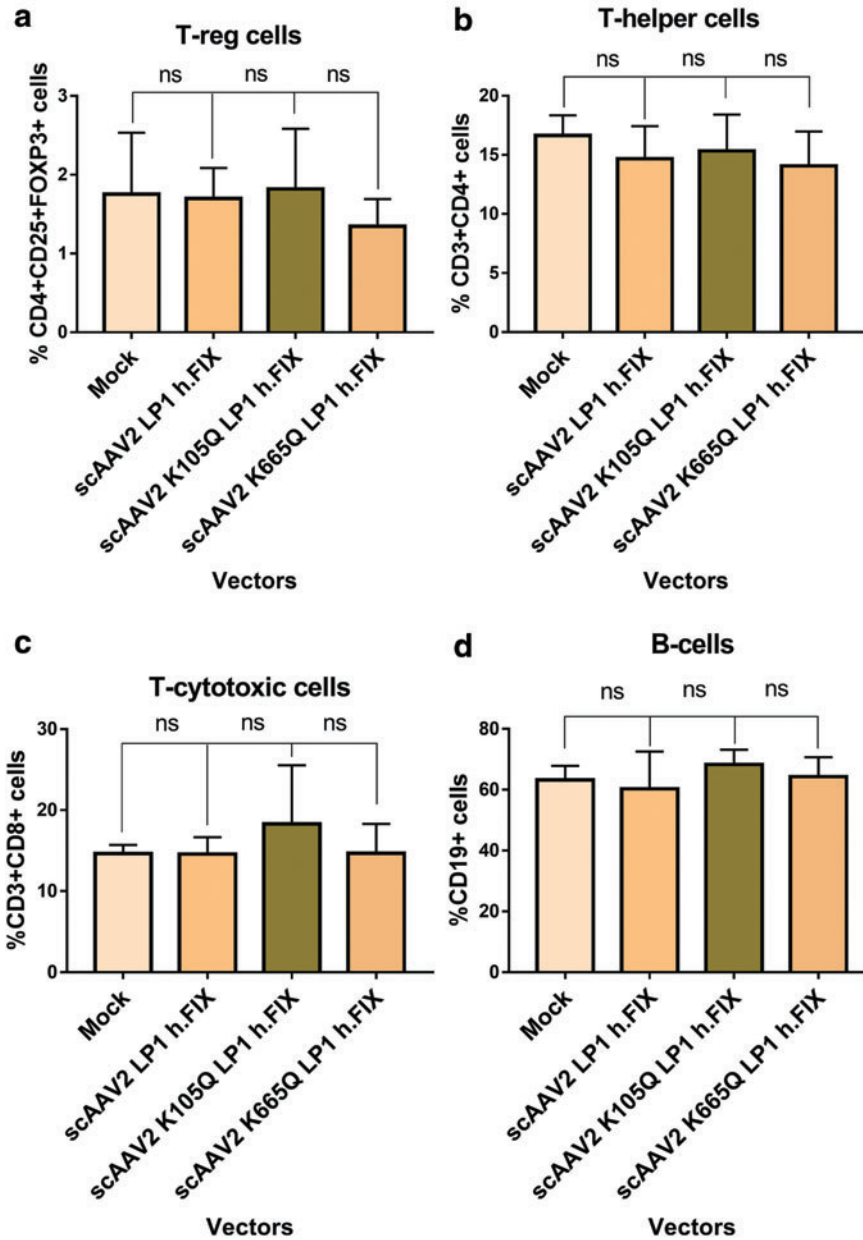

**Supplementary Figure S6.** Immune response in hemophilia B mice administered with AAV2 wild-type or mutant vectors. Blood samples collected at nine weeks after hepatic gene transfer were assessed for T cell and B cell markers by flow cytometry. Data for regulatory T cells (CD4<sup>+</sup>CD25<sup>+</sup> and FoxP3) in splenocytes (**a**), helper T cells (CD3<sup>+</sup>CD4<sup>+</sup>) (**b**), cytotoxic T cells (CD3<sup>+</sup>CD8<sup>+</sup>) (**c**), B lymphocytes (**d**) in peripheral blood from mock (PBS)-injected or AAV2-administered animals are shown. Dunnett's multiple comparisons test was used to determine the statistical significance. Data are expressed as mean ± SD from five animals per group. PBS, phosphate-buffered saline; ns, not significant.
