# Supplementary material for: Rational Engineering and Preclinical Evaluation of Neddylation and SUMOylation Site Modified Adeno-Associated Virus Vectors in Murine Models of Hemophilia B and Leber Congenital Amaurosis
Source: PubMed Central journal article supplement (PMC6919284; doi:10.1089/hum.2019.164), 2019-11-26
Supplement: Supp_Fig7.pdf [file Supp_Fig7.pdf]

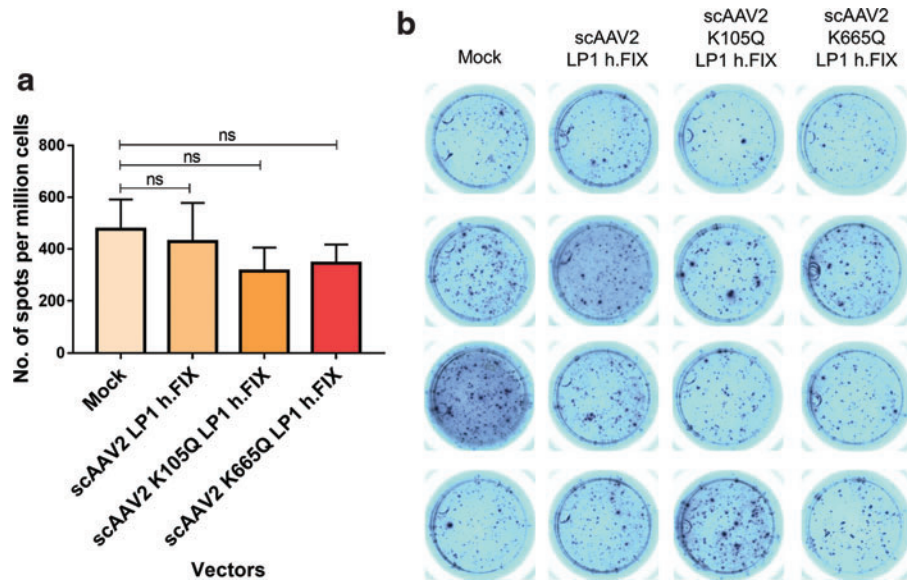

**Supplementary Figure S7.** IFN- $\gamma$ -based ELISPOT assay to measure AAV2 capsid-specific T cell response. The graph shows the number of spots generated by  $1 \times 10^6$  splenocyte cells stimulated by AAV2 capsid-specific peptide (**a**). Representative images of generated spots from mock ( $n=10$ ), AAV2 WT ( $n=10$ ) and mutant treated ( $n=5$ ) conditions are shown. Concavalin A was used as the positive control (data not shown) (**b**). Dunnett's multiple comparisons test was used to determine the statistical significance. Data are expressed as mean  $\pm$  SD of the number of spots obtained from splenocytes seeded in duplicate wells for each of the mice per group.  $p$ -Values were not significant (<sup>ns</sup> $p > 0.05$ ) versus mock-injected hemophilia B mice.
