# Supplementary material for: Rational Engineering and Preclinical Evaluation of Neddylation and SUMOylation Site Modified Adeno-Associated Virus Vectors in Murine Models of Hemophilia B and Leber Congenital Amaurosis
Source: PubMed Central journal article supplement (PMC6919284; doi:10.1089/hum.2019.164), 2019-11-26
Supplement: Supp_Tables1-2.pdf [file Supp_Tables1-2.pdf]

**Supplementary Table S1. Primers designed for analyzing gene expression of Neddylation pathway genes**

| Pathway     | Enzyme           | Name                            | Primer | Length (bp) | Amplicon Length (bp) |
|-------------|------------------|---------------------------------|--------|-------------|----------------------|
| Neddylation |                  |                                 |        |             |                      |
| E1          | APPBP1           | 5'-CTTCCTTCAAAGAAGCAGTATCGG-3'  |        | 24          | 139                  |
|             |                  | 5'-CTGGACTCTCTTCCACAAAACCTTC-3' |        | 24          |                      |
| E1          | UBA3             | 5'-GGTCGCTGGAACCATGTAAAGA-3'    |        | 22          | 129                  |
|             |                  | 5'-GCCAGCTCCAATGACTAGAACTTT-3'  |        | 24          |                      |
| E2          | UBC12<br>(UBE2M) | 5'-TCCAGAAGGACATAAACGAGCTG-3'   |        | 23          | 97                   |
|             |                  | 5'-GGACAGATGACCAGCTTGAAGT-3'    |        | 22          |                      |
|             | NEDD8            | 5'-GAACCTACAGACAAGGTGGAGC-3'    |        | 22          | 119                  |
|             |                  | 5'-GCTGCTGTCTTCTCATCATTTCATC-3' |        | 24          |                      |

**Supplementary Table S2. Primers designed for analyzing gene expression of SUMOylation pathway genes**

| Enzyme              | Targets in      | Name                             | Primer | Length (bp) | Amplicon Length (bp) |
|---------------------|-----------------|----------------------------------|--------|-------------|----------------------|
| SUMOylation pathway |                 |                                  |        |             |                      |
| E1                  | SAE1            | 5'-AGTCATTTTTCACTCAATTCGATGCT-3' |        | 26          | 122                  |
|                     |                 | 5'-GCCAAAACATCTCCTGTAAAGAAC-3'   |        | 25          |                      |
| E1                  | SAE2            | 5'-GCTGGGTATCTTGGACAAGTAACT-3'   |        | 24          | 92                   |
|                     |                 | 5'-CCAGGAAAGGTTCTCTGGGTC-3'      |        | 21          |                      |
| E2                  | UBC9<br>(UBE2I) | 5'-GCCATTCCAGGAAAGAAAGGGA-3'     |        | 22          | 90                   |
|                     |                 | 5'-TGGTGGCGAAGATGGATAATCATC-3'   |        | 24          |                      |
|                     | SUMO1           | 5'-GGCAAAACCTTCAACTGAGGAC-3'     |        | 22          | 91                   |
|                     |                 | 5'-GTGAATCTCACTGCTATCCTGTCC-3'   |        | 24          |                      |
