# Supplementary material for: Rational Engineering and Preclinical Evaluation of Neddylation and SUMOylation Site Modified Adeno-Associated Virus Vectors in Murine Models of Hemophilia B and Leber Congenital Amaurosis
Source: PubMed Central journal article supplement (PMC6919284; doi:10.1089/hum.2019.164), 2019-11-26
Supplement: Supp_Tables3-6.pdf [file Supp_Tables3-6.pdf]

**Supplementary Table S3. Neddyltion sites predicted by NeddyPreddy on AAV2 VP1 capsid protein**

| S. No. | Position <sup>a</sup> | Peptide                                    | Score | Probability |
|--------|-----------------------|--------------------------------------------|-------|-------------|
| 1      | 33                    | 23-WK <sup>1</sup> LKPGPPPPKPAERHKDDSR-43  | 1.09  | 0.53        |
| 2      | 640                   | 630-PSPLMGGFGLKHPPQILIKN-650               | 0.85  | 0.40        |
| 3      | 61                    | 50-KYLGFNGLDKGEPVNEADAA-70                 | 0.66  | 0.30        |
| 4      | 490                   | 480-GPCYRQQRVSKTSADNNNSEY-500              | 0.43  | 0.21        |
| 5      | 665                   | 655-ANPSTTFSAAKFASFITQYST-675              | 0.36  | 0.18        |
| 6      | 39                    | 29-PPPKPAERHKDDSRGLVLP-49                  | 0.18  | 0.13        |
| 7      | 24                    | 14-TLSEGIQWWWK <sup>1</sup> LKPGPPPKP-34   | 0.16  | 0.13        |
| 8      | 161                   | 151-VEPDSSSGTGKAGQQPARKL-171               | 0.03  | 0.10        |
| 9      | 620                   | 610-DVYLQGP <sup>1</sup> WAKIPHTDGHFHP-630 | 0.03  | 0.10        |

The predicted site is presented in bold font.

<sup>a</sup>The numbering of amino acids in VP1 capsid protein is according to the NCBI Protein ID: YP\_680426.1.

**Supplementary Table S4. SUMOylation sites predicted by GPS-SUMO on AAV2 VP1 capsid protein**

| S. No. | Position <sup>a</sup> | Peptide                          | Score  |
|--------|-----------------------|----------------------------------|--------|
| 1      | 105                   | 98-AEFOER <b>LKED</b> TSFGG-112  | 37.13  |
| 2      | 137                   | 130-GLVEEP <b>VKT</b> APGKKR-144 | 38.488 |
| 3      | 527                   | 520-GPAMAS <b>HKDD</b> EЕКFF-534 | 42.941 |

Indicated region denotes consensus motif for SUMOylation.

<sup>a</sup>The numbering of amino acids in VP1 capsid protein is according to the NCBI Protein ID: YP\_680426.1.

**Supplementary Table S5. SUMOylation sites predicted by SUMOplot on AAV2 VP1 capsid protein**

| S. No. | Position <sup>a</sup> | Peptide                         | Score |
|--------|-----------------------|---------------------------------|-------|
| 1      | 105                   | 99-EFOER <b>LKED</b> TSFGG-112  | 0.91  |
| 2      | 640                   | 634-MGGFG <b>LKHP</b> PPQIL-647 | 0.8   |
| 3      | 26                    | 20-RQWWK <b>LKPG</b> PPPPK-33   | 0.73  |
| 4      | 620                   | 614-QGPIW <b>AKIP</b> HTDGH-627 | 0.69  |
| 5      | 527                   | 521-PAMAS <b>HKDD</b> EEKFF-534 | 0.52  |
| 6      | 39                    | 33-KPAER <b>HKDD</b> SRGLV-46   | 0.52  |
| 7      | 544                   | 538-GVLIF <b>GKQG</b> SEKTN-551 | 0.5   |
| 8      | 314                   | 308-PKRLN <b>FKLF</b> NIQVK-321 | 0.5   |
| 9      | 161                   | 155-SSSGT <b>GKAG</b> QQPAR-168 | 0.5   |
| 10     | 61                    | 55-PFNGL <b>DKGE</b> PVNEA-68   | 0.5   |
| 11     | 143                   | 137-KTAPG <b>KKRP</b> VEHSP-150 | 0.37  |
| 12     | 532                   | 526-HKDE <b>EKFF</b> PQSGV-539  | 0.15  |

Indicated region denotes consensus motif for SUMOylation.

<sup>a</sup>The numbering of amino acids in VP1 capsid protein is according to the NCBI Protein ID: YP\_680426.1.

**Supplementary Table S6. Primers designed to abolish predicted Neddyltion sites from lysine to glutamine**

| Mutation     | Primers                                                                                                                          | Size (bp) |
|--------------|----------------------------------------------------------------------------------------------------------------------------------|-----------|
| <b>K33Q</b>  | 5'-AAACCTGGCCACCACCACC <b>AC</b> AGCCCGCAGAGCGGC<br>ATAAGGA-3'<br>5'-TCCTTATGCCGCTCTGCGGGCT <b>G</b> TGGTGGTGGTGGCC<br>AGGTTT-3' | 44        |
| <b>K61Q</b>  | 5'-CTTCAACGGACTCGACC <b>AG</b> GGGAGAGCCGGTCAA-3'<br>5'-TTGACCGGCTCTCCCT <b>G</b> GTCGAGTCCGTTGAAG-3'                            | 33        |
| <b>K640Q</b> | 5'-CATGGGTGGATTTCGACTT <b>CA</b> ACACCCTCTCCACAGAT-3'<br>5'-ATCTGTGGAGGAGGGTGT <b>G</b> AAGTCCGAATCCACCCATG-3'                   | 39        |
| <b>K490Q</b> | 5'-CCAGCAGCGAGTATC <b>AC</b> AGACATCTGCGGATAACAACAAC-3'<br>GTTGTTGTTATCCGAGATGTCT <b>G</b> TGATACTCGCTGCTGG-3'                   | 40        |
| <b>K665Q</b> | 5'-ACCACCTCAGTGGCG <b>CA</b> CAGTTTGGTCTCCTC-3'<br>5'-GAAGGAAGCAA <b>CTG</b> TGCCGCACTGAAGGTGGT-3'                               | 33        |

The boldface font indicates the site of mutation.
