# Supplementary material for: Rational Engineering and Preclinical Evaluation of Neddylation and SUMOylation Site Modified Adeno-Associated Virus Vectors in Murine Models of Hemophilia B and Leber Congenital Amaurosis
Source: PubMed Central journal article supplement (PMC6919284; doi:10.1089/hum.2019.164), 2019-11-26
Supplement: Supp_Tables7-9.pdf [file Supp_Tables7-9.pdf]

**Supplementary Table S7.** Primers designed for mutagenesis of predicted SUMOylation sites from lysine to glutamine residue

| Mutation     | Primer                                                 | Size (bp) |
|--------------|--------------------------------------------------------|-----------|
| <b>K26Q</b>  | 5'-TTTGGTGGTGGTGGCCAGGTT <b>GG</b> AGCTTCCACCACTGT-3'  | 39        |
|              | 5'-ACAGTGGTGAAGCT <b>CA</b> ACCTGGCCACCACCACCAAA-3'    |           |
| <b>K39Q</b>  | 5'-CCTGCTGTCGCCT <b>G</b> ATGCCGCTCTGCGGGCTTT-3'       | 34        |
|              | 5'-AAAGCCCGCAGAGCGGCAT <b>C</b> AGGACGACAGCAGG-3'      |           |
| <b>K105Q</b> | 5'-CCCCAAAAGACGTATCTT <b>GA</b> AGGCGCTCCTGAAACTCC-3'  | 41        |
|              | 5'-GGAGTTTCAGGAGCGCCT <b>CA</b> AGAAGATACGTCTTTGGGG-3' |           |
| <b>K527Q</b> | 5'-AACTTTTCTTCATCGTCCT <b>GG</b> TGGCTTGCCATGGCCGGG-3' | 39        |
|              | 5'-CCCGCCATGGCAAGCCACC <b>AG</b> GACGATGAAGAAAAGTT-3'  |           |
| <b>K620Q</b> | 5'-GTCCGTGTGTGGAATCT <b>GT</b> GCCAGATGGGCCCTGAAG-3'   | 39        |
|              | 5'-CTTCAGGGGCCATCTGGGC <b>CA</b> CAGATTCCACACACGGAC-3' |           |

The boldface font indicates the site of mutation.

**Supplementary Table S9.** Physical particle titers for the vectors (AAV2-EGFP and AAV2 SUMOylation site mutants) generated in this study

| Vector            | Titer (vgs/mL) |
|-------------------|----------------|
| scAAV2-EGFP       | 2.00E+11       |
| scAAV2 K26Q-EGFP  | 8.71E+11       |
| scAAV2 K39Q-EGFP  | 5.45E+11       |
| scAAV2 K105Q-EGFP | 4.69E+11       |
| scAAV2 K527Q-EGFP | 1.38E+12       |
| scAAV2 K620Q-EGFP | 4.14E+11       |

The data are presented as vector genomes per milliliter (vgs/mL).

**Supplementary Table S8.** Physical particle titers for the vectors (AAV2-EGFP and AAV2 Neddylation site mutants) generated in this study

| Vector            | Titer (vgs/mL) |
|-------------------|----------------|
| scAAV2-EGFP       | 2.00E+11       |
| scAAV2 K33Q-EGFP  | 8.52E+11       |
| scAAV2 K61Q-EGFP  | 4.31E+11       |
| scAAV2 K490Q-EGFP | 1.64E+12       |
| scAAV2 K640Q-EGFP | 1.56E+12       |
| scAAV2 K665Q-EGFP | 6.25E+11       |

The data are presented as vector genomes per milliliter (vgs/mL).
